# Supplementary material for: Quantitative NanoLC/NSI+-HRMS Method for 1,3-Butadiene Induced bis-N7-guanine DNA-DNA Cross-Links in Urine
Source: MDPI journal article supplement (doi:10.3390/toxics9100247), 2021-10-02
Supplement: s1 [file s1]

# Supplementary Materials: Quantitative NanoLC/NSI<sup>+</sup>-HRMS Method for 1,3-Butadiene Induced bis-N7-guanine DNA-DNA Cross-links in Urine

Luke Erber, Samantha Goodman, Caitlin C. Jokipii Krueger, Ivan Rusyn and Natalia Tretyakova

**Table S1.** Method validation results for nanoLC-NSI<sup>+</sup> HRMS analysis of bis-N7G-BD (5 fmol) spiked into control mouse urine (10  $\mu$ L).

| Day      | Mean            | RSD (%) | accuracy (%)     | N |
|----------|-----------------|---------|------------------|---|
| 1        | 5.36 $\pm$ 0.06 | 1.4     | 107.3 $\pm$ 1.5  | 3 |
| 2        | 5.32 $\pm$ 0.34 | 7.9     | 106.5 $\pm$ 8.4  | 3 |
| 3        | 5.09 $\pm$ 0.42 | 10.3    | 101.8 $\pm$ 10.4 | 3 |
| Interday | 5.26 $\pm$ 0.12 | 2.8     | 105.2 $\pm$ 2.4  | 9 |

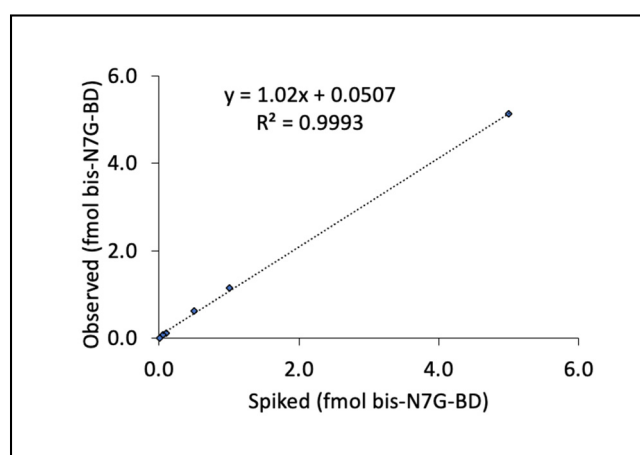

**Figure S1.** NanoLC/NSI<sup>+</sup>-HRMS method validation: correlation between spiked and the observed amounts of bis-B7G-BD spiked into 10 $\mu$ L synthetic urine. Spiked amounts were 0, 0.01, 0.5, 1, 2, or 5 fmol of bis-N7G-BD and 5 fmol of <sup>15</sup>N<sub>6</sub>- bis-N7G-BD (internal standard), followed by sample processing and nanoLC/ESI<sup>+</sup>-HRMS analysis.

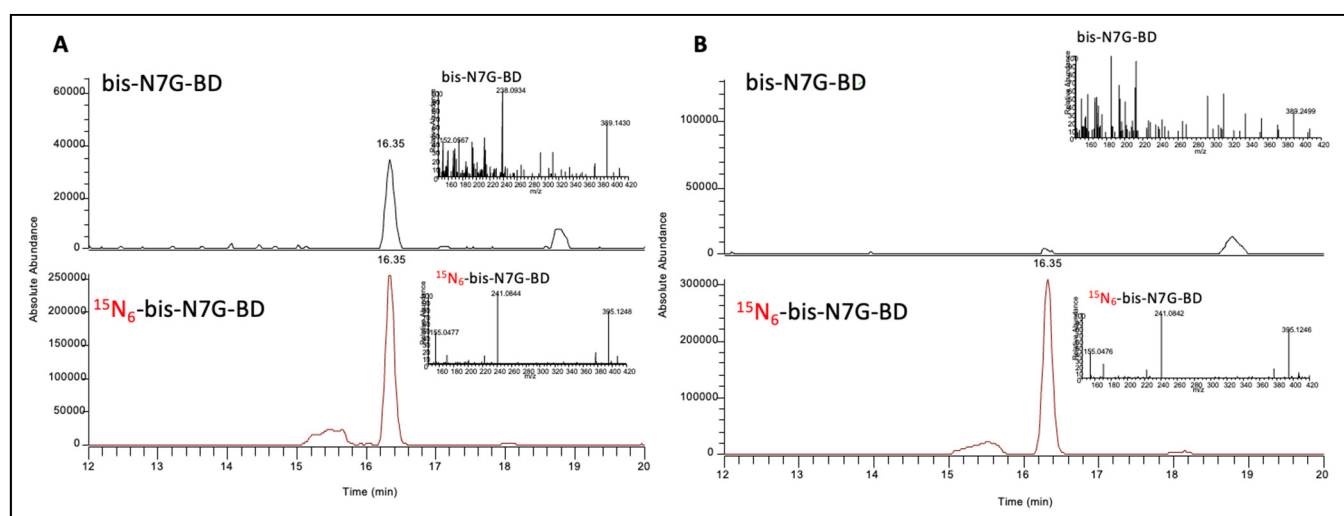

**Figure S2.** NanoLC/NSI<sup>+</sup> HRMS analysis of unexposed mouse urine (10  $\mu$ L), spiked with bis-N7G-BD (1 fmol, LOQ sample) and [<sup>15</sup>N<sub>6</sub>]-bis-N7G-BD (10 fmol) (A) and unexposed mouse urine sample with endogenous levels of bis-N7G-BD, spiked only with [<sup>15</sup>N<sub>6</sub>]-bis-N7G-BD (10 fmol) (B). Results are shown with a 5 ppm mass tolerance.

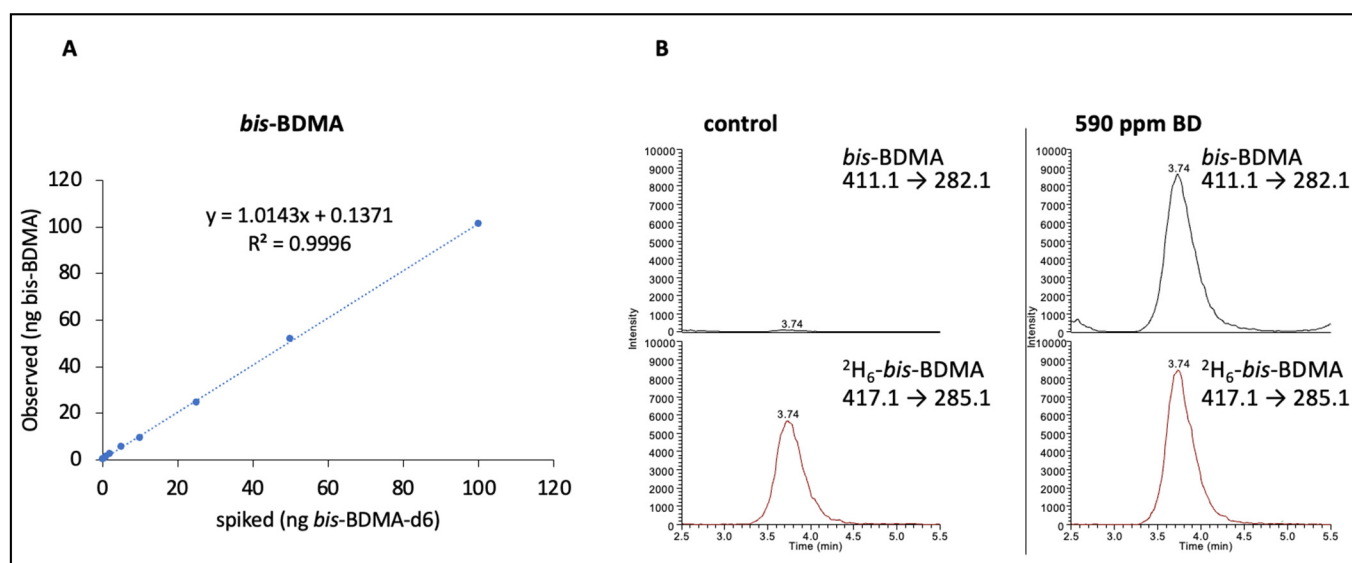

**Figure S3.** Bis-BDMA nanoLC/ESI-HRMS method validation. (A) NanoLC/ESI-MS/MS method validation: correlation between the spiked and the observed amounts of *bis*-BDMA spiked into control mouse urine (10  $\mu\text{L}$ ). (B) Representative extracted ion chromatogram for *bis*-BDMA in urine of 1,3-butadiene-exposed and control mice (10  $\mu\text{L}$ ).

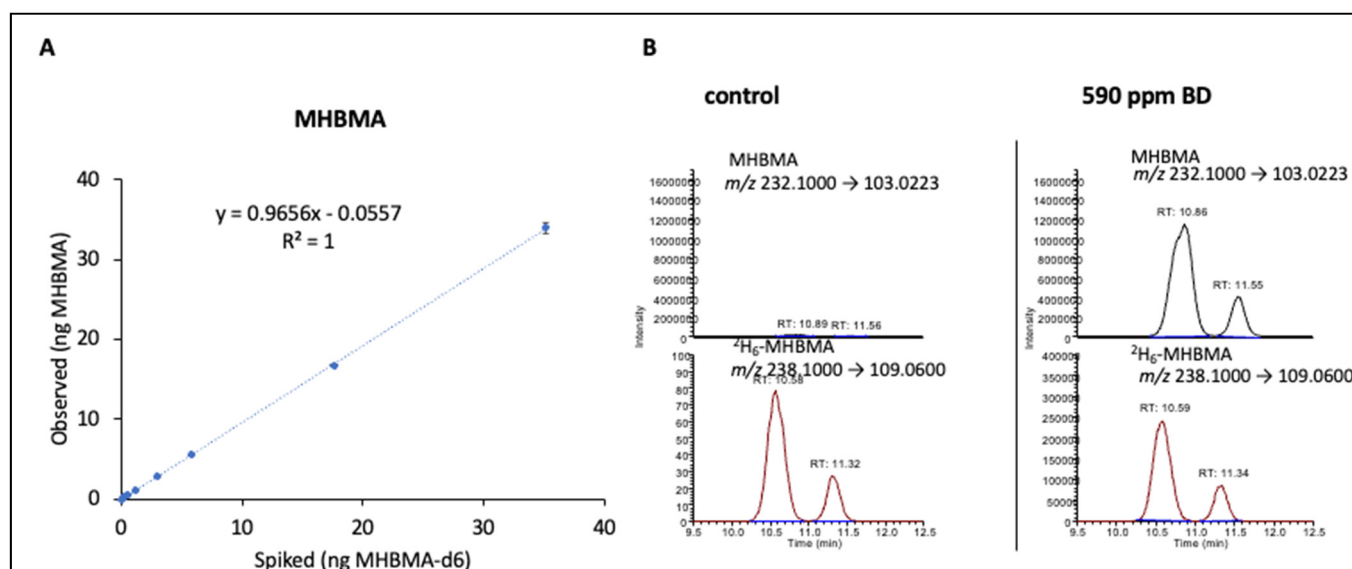

**Figure S4.** MHBMA HPLC/ESI-HRMS method validation. (A) NanoLC/ESI<sup>+</sup>-HRMS method validation: correlation between the spiked and the observed amounts of MHBMA spiked into control mouse urine (20  $\mu\text{L}$ ). (B) Representative extracted ion chromatogram for MHBMA in urine of 1,3-butadiene-exposed and control mice (20  $\mu\text{L}$ ).

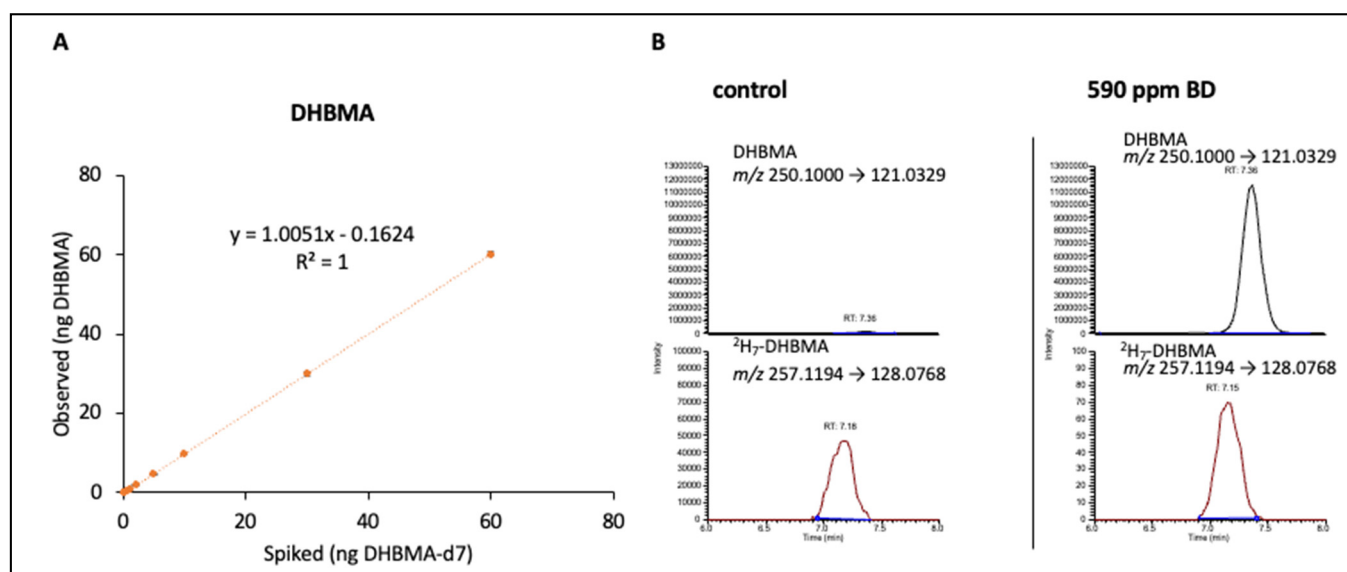

**Figure S5.** DHBMA HPLC/ESI-HRMS method validation. (A) Correlation between the spiked and the observed amounts of DHBMA spiked into control mouse urine (20  $\mu$ L). (B) Representative extracted ion chromatogram for DHBMA in urine of 1,3-butadiene-exposed and control mice (20  $\mu$ L).

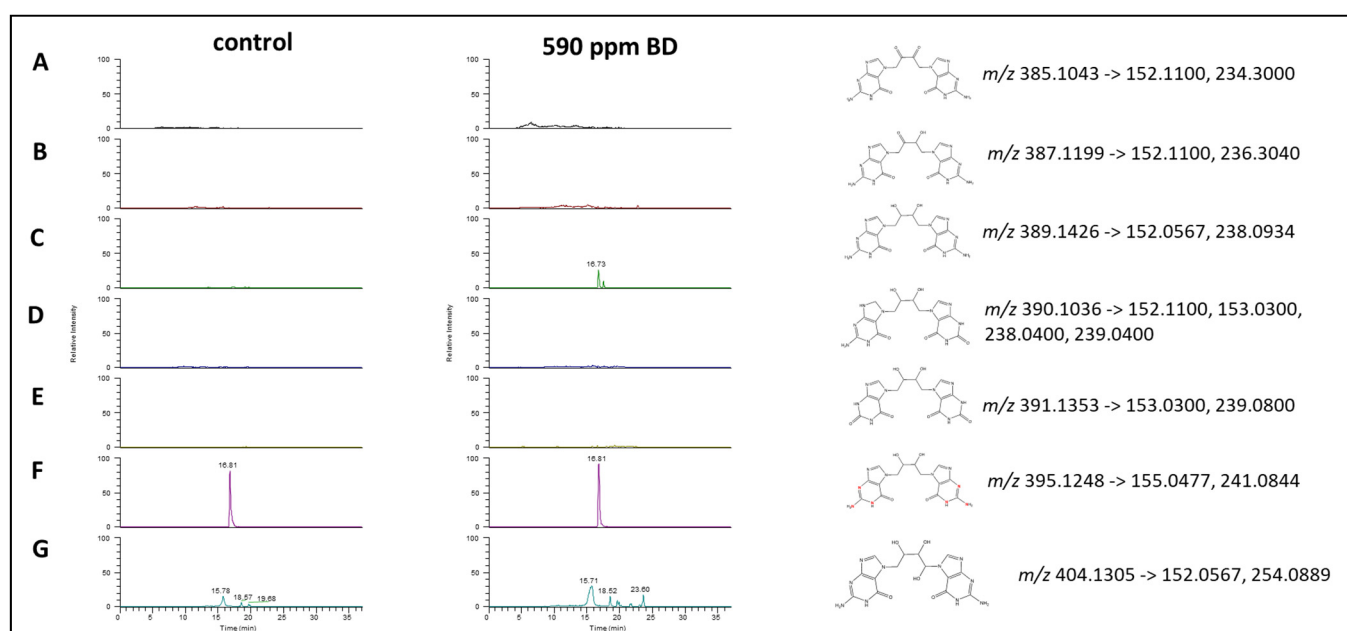

**Figure S6.** NanoLC/NSI+ HRMS identification of metabolic products of bis-N7G-BD in BD-expose mouse urine. (A) bis-N7G-BD oxidized twice, (B) bis-N7G-BD oxidized once, (C) bis-N7G-BD, (D) bis-N7G-BD deamidated once, (E) bis-N7G-BD deamidated twice, (F) [ $^{15}N_6$ ]-bis-N7G-BD and (G) bis-N7G-BD containing three hydroxyl groups on the guanine butadiene-derived alkyl linker.
